# Supplementary material for: Six new coordination polymers based on a tritopic pyridyldicarboxylate ligand: structural, magnetic and sorption properties
Source: Royal Society of Chemistry journal article supplement (doi:10.1039/c4ce00890a), 2014-01-01
Supplement: c4ce00890a1.pdf [file c4ce00890a1.pdf]

# Six new coordination polymers based on a tritopic pyridyldicarboxylate ligand: Structures, Magnetic, and Sorption Properties

Tao Ding,<sup>†,‡</sup> Li-Di Ren,<sup>‡</sup> Xiao-Di Du,<sup>‡</sup> Li Quan,<sup>‡</sup> Zi-Wei Gao<sup>\*,†</sup>, Wei-Qiang Zhang,<sup>†</sup>  
Chang-Zheng Zheng<sup>\*,‡</sup>

<sup>†</sup>Key Laboratory of Applied Surface and Colloid Chemistry, Ministry of Education,  
School of Chemistry & Chemical Engineering Shaanxi Normal University, Xi'an  
710062, P. R. China.

<sup>‡</sup>College of Environment and Chemistry Engineering, Xi'an Polytechnic  
University, Xi'an 710048, P. R. China.

**Table S1.** Selected Bond Lengths (Å) and Bond Angles (°) for Complex **1**

|                                                          |            |                     |            |
|----------------------------------------------------------|------------|---------------------|------------|
| Co(1)-O(2)#1                                             | 2.033(4)   | Co(1)-O(5)          | 2.191(5)   |
| Co(1)-O(1)#2                                             | 2.082(4)   | Co(1)-O(3)#3        | 2.142(4)   |
| Co(1)-N(1)                                               | 2.139(4)   | Co(1)-O(4)#3        | 2.236(4)   |
| O(2)#1-Co(1)-O(1)#2                                      | 98.28(16)  | O(1)#2-Co(1)-O(3)#3 | 92.65(16)  |
| O(2)#1-Co(1)-N(1)                                        | 105.77(15) | N(1)-Co(1)-O(4)#3   | 153.71(13) |
| O(1)#2-Co(1)-N(1)                                        | 91.09(15)  | O(3)#3-Co(1)-O(4)#3 | 60.49(14)  |
| O(2)#1-Co(1)-O(3)#3                                      | 157.75(14) | O(5)-Co(1)-O(4)#3   | 90.25(19)  |
| N(1)-Co(1)-O(3)#3                                        | 93.26(14)  | O(3)#3-Co(1)-O(5)   | 86.31(19)  |
| O(2)#1-Co(1)-O(5)                                        | 82.60(19)  | O(2)#1-Co(1)-O(4)#3 | 100.22(15) |
| O(1)#2-Co(1)-O(5)                                        | 178.91(16) | O(1)#2-Co(1)-O(4)#3 | 88.97(16)  |
| N(1)-Co(1)-O(5)                                          | 89.27(19)  |                     |            |
| Symmetry code: #1 x-1,y+1,z #2 -x+1,-y,-z+1 #3 x+1,y,z-1 |            |                     |            |

**Table S2.** Selected Bond Lengths (Å) and Bond Angles (°) for Complex 2

|                                                                      |           |                     |           |
|----------------------------------------------------------------------|-----------|---------------------|-----------|
| Co(1)-O(2)                                                           | 2.032(19) | Co(2)-O(5)          | 2.032(19) |
| Co(1)-O(6)                                                           | 2.063(2)  | Co(2)-O(1)          | 2.060(2)  |
| Co(1)-O(2W)                                                          | 2.125(2)  | Co(2)-O(3)#3        | 2.136(18) |
| Co(1)-O(7)#1                                                         | 2.138(18) | Co(2)-O(1W)         | 2.139(2)  |
| Co(1)-N(2)#2                                                         | 2.162(2)  | Co(2)-N(1)#4        | 2.158(2)  |
| Co(1)-O(8)#1                                                         | 2.255(2)  | Co(2)-O(4)#3        | 2.253(2)  |
| O(2)-Co(1)-O(6)                                                      | 99.18(8)  | O(5)-Co(2)-O(1)     | 100.23(8) |
| O(2)-Co(1)-O(2W)                                                     | 83.41(8)  | O(5)-Co(2)-O(3)#3   | 151.27(8) |
| O(6)-Co(1)-O(2W)                                                     | 177.32(7) | O(1)-Co(2)-O(3)#3   | 92.62(8)  |
| O(2)-Co(1)-O(7)#1                                                    | 152.12(8) | O(5)-Co(2)-O(1W)    | 83.18(8)  |
| O(6)-Co(1)-O(7)#1                                                    | 93.31(8)  | O(1)-Co(2)-O(1W)    | 176.53(7) |
| O(2W)-Co(1)-O(7)#1                                                   | 84.06(8)  | O(3)#3-Co(2)-O(1W)  | 84.58(8)  |
| O(2)-Co(1)-N(2)#2                                                    | 107.42(9) | O(5)-Co(2)-N(1)#4   | 108.09(9) |
| O(6)-Co(1)-N(2)#2                                                    | 90.00(8)  | O(1)-Co(2)-N(1)#4   | 89.84(8)  |
| O(2W)-Co(1)-N(2)#2                                                   | 89.87(8)  | O(3)#3-Co(2)-N(1)#4 | 97.44(8)  |
| O(7)#1-Co(1)-N(2)#2                                                  | 97.34(8)  | O(1W)-Co(2)-N(1)#4  | 88.49(8)  |
| O(2)-Co(1)-O(8)#1                                                    | 95.93(8)  | O(5)-Co(2)-O(4)#3   | 95.42(8)  |
| O(6)-Co(1)-O(8)#1                                                    | 87.89(8)  | O(1)-Co(2)-O(4)#3   | 86.67(8)  |
| O(2W)-Co(1)-O(8)#1                                                   | 91.17(8)  | O(3)#3-Co(2)-O(4)#3 | 59.55(8)  |
| O(7)#1-Co(1)-O(8)#1                                                  | 59.54(8)  | O(1W)-Co(2)-O(4)#3  | 93.66(8)  |
| N(2)#2-Co(1)-O(8)#1                                                  | 156.59(8) | N(1)#4-Co(2)-O(4)#3 | 156.47(8) |
| Symmetry code: #1 -x+2,-y+1,-z+1 #2 -x+2,-y+2,-z+1 #3 -x+1,-y+3,-z+2 |           |                     |           |
| #4 -x+1,-y+2,-z+2                                                    |           |                     |           |

**Table S3.** Selected Bond Lengths (Å) and Bond Angles (°) for Complex 3

|                     |           |                     |           |
|---------------------|-----------|---------------------|-----------|
| Co(1)-O(3)#1        | 2.030(14) | Co(1)-O(1)#2        | 2.216(13) |
| Co(1)-O(5)          | 2.068(14) | Co(2)-O(4)#3        | 2.040(13) |
| Co(1)-N(1)          | 2.094(13) | Co(2)-O(1)#2        | 2.095(12) |
| Co(1)-O(1w)         | 2.127(16) | Co(2)-O(6)          | 2.142(14) |
| Co(1)-O(2)#2        | 2.153(14) | O(4)#1-Co(2)-O(4)#3 | 180.00(6) |
| O(3)#1-Co(1)-O(5)   | 91.91(7)  | O(4)#1-Co(2)-O(1)#2 | 87.21(5)  |
| O(3)#1-Co(1)-N(1)   | 95.44(6)  | O(4)#3-Co(2)-O(1)#2 | 92.79(5)  |
| O(5)-Co(1)-N(1)     | 90.29(6)  | O(4)#1-Co(2)-O(1)#4 | 92.79(5)  |
| O(3)#1-Co(1)-O(1w)  | 89.54(7)  | O(4)#3-Co(2)-O(1)#4 | 87.21(5)  |
| O(5)-Co(1)-O(1w)    | 178.47(8) | O(2)#2-Co(1)-O(1)#2 | 59.80(5)  |
| N(1)-Co(1)-O(1w)    | 89.91(6)  | O(4)#1-Co(2)-O(6)#5 | 85.29(6)  |
| O(3)#1-Co(1)-O(2)#2 | 169.03(5) | O(4)#3-Co(2)-O(6)#5 | 94.71(6)  |
| O(5)-Co(1)-O(2)#2   | 89.53(7)  | O(1)#2-Co(2)-O(6)#5 | 86.50(5)  |
| N(1)-Co(1)-O(2)#2   | 95.42(5)  | O(1)#4-Co(2)-O(6)#5 | 93.50(5)  |

|                     |           |                     |          |
|---------------------|-----------|---------------------|----------|
| O(7)-Co(1)-O(2)#2   | 88.98(7)  | O(4)#1-Co(2)-O(6)   | 94.71(6) |
| O(3)#1-Co(1)-O(1)#2 | 109.23(5) | O(4)#3-Co(2)-O(6)   | 85.29(6) |
| O(5)-Co(1)-O(1)#2   | 96.55(5)  | O(1)#2-Co(2)-O(6)   | 93.50(5) |
| N(1)-Co(1)-O(1)#2   | 154.07(5) | O(1)#4-Co(2)-O(6)   | 86.50(5) |
| O(7)-Co(1)-O(1)#2   | 82.64(5)  | O(1)#2-Co(2)-O(1)#4 | 180.00   |

Symmetry code: #1 x,-y,z-1/2 #2 x-1/2,y-1/2,z #3 -x+1,y-1,-z+1/2  
#4 -x+3/2,-y-1/2,-z #5 -x+1,-y-1,-z

**Table S4.** Selected Bond Lengths (Å) and Bond Angles (°) for Complex 4

|                      |            |                      |            |
|----------------------|------------|----------------------|------------|
| Co(1)-O(3)#1         | 2.020(4)   | Co(3)-N(3)           | 2.183(5)   |
| Co(1)-O(1W)          | 2.050(4)   | Co(3)-O(8)#6         | 2.202(4)   |
| Co(1)-O(3W)          | 2.063(4)   | Co(3)-O(10)#2        | 2.263(4)   |
| Co(1)-O(9)#2         | 2.078(4)   | Co(4)-O(1W)          | 2.040(4)   |
| Co(1)-O(16)#3        | 2.154(4)   | Co(4)-O(14)          | 2.073(4)   |
| Co(1)-O(2W)          | 2.269(4)   | Co(4)-O(15)#3        | 2.086(4)   |
| Co(2)-O(2)#4         | 2.043(4)   | Co(4)-O(6)           | 2.087(4)   |
| Co(2)-O(3W)          | 2.080(4)   | Co(4)-N(1)           | 2.155(5)   |
| Co(2)-O(12)#5        | 2.084(4)   | Co(4)-O(2W)          | 2.277(4)   |
| Co(2)-O(10)#2        | 2.181(4)   | Co(5)-O(3W)          | 2.070(4)   |
| Co(2)-N(2)#2         | 2.224(5)   | Co(5)-O(1)#4         | 2.095(4)   |
| Co(2)-O(8)#6         | 2.270(4)   | Co(5)-O(4)#1         | 2.105(4)   |
| Co(3)-O(1W)          | 2.029(4)   | Co(5)-O(11)#5        | 2.147(4)   |
| Co(3)-O(13)          | 2.062(4)   | Co(5)-N(4)#4         | 2.164(5)   |
| Co(3)-O(5)           | 2.087(4)   | Co(5)-O(4W)          | 2.209(4)   |
| O(3)#1-Co(1)-O(1W)   | 169.87(16) | O(5)-Co(3)-O(8)#6    | 172.09(16) |
| O(3)#1-Co(1)-O(3W)   | 98.31(16)  | N(3)-Co(3)-O(8)#6    | 87.75(16)  |
| O(1W)-Co(1)-O(3W)    | 91.08(14)  | O(1W)-Co(3)-O(10)#2  | 85.86(14)  |
| O(3)#1-Co(1)-O(9)#2  | 89.90(17)  | O(13)-Co(3)-O(10)#2  | 175.19(15) |
| O(1W)-Co(1)-O(9)#2   | 93.06(15)  | O(5)-Co(3)-O(10)#2   | 89.91(15)  |
| O(3W)-Co(1)-O(9)#2   | 94.96(15)  | N(3)-Co(3)-O(10)#2   | 92.58(16)  |
| O(3)#1-Co(1)-O(16)#3 | 88.33(17)  | O(8)#6-Co(3)-O(10)#2 | 83.91(14)  |
| O(1W)-Co(1)-O(16)#3  | 87.14(15)  | O(1W)-Co(4)-O(14)    | 90.99(15)  |
| O(3W)-Co(1)-O(16)#3  | 94.67(15)  | O(1W)-Co(4)-O(15)#3  | 88.07(16)  |
| O(9)#2-Co(1)-O(16)#3 | 170.37(16) | O(14)-Co(4)-O(15)#3  | 94.45(18)  |
| O(3)#1-Co(1)-O(2W)   | 87.61(16)  | O(1W)-Co(4)-O(6)     | 96.46(16)  |
| O(1W)-Co(1)-O(2W)    | 83.01(14)  | O(14)-Co(4)-O(6)     | 100.19(18) |
| O(3W)-Co(1)-O(2W)    | 174.08(15) | O(15)#3-Co(4)-O(6)   | 164.58(18) |
| O(9)#2-Co(1)-O(2W)   | 84.92(16)  | O(1W)-Co(4)-N(1)     | 175.78(18) |
| O(16)#3-Co(1)-O(2W)  | 85.55(15)  | O(14)-Co(4)-N(1)     | 90.67(17)  |

|                                                                       |            |                      |            |
|-----------------------------------------------------------------------|------------|----------------------|------------|
| O(2)#4-Co(2)-O(3W)                                                    | 97.62(16)  | O(15)#3-Co(4)-N(1)   | 87.89(18)  |
| O(2)#4-Co(2)-O(12)#5                                                  | 97.65(17)  | O(6)-Co(4)-N(1)      | 87.11(18)  |
| O(3W)-Co(2)-O(12)#5                                                   | 90.53(15)  | O(1W)-Co(4)-O(2W)    | 83.02(14)  |
| O(2)#4-Co(2)-O(10)#2                                                  | 88.28(15)  | O(14)-Co(4)-O(2W)    | 173.94(16) |
| O(3W)-Co(2)-O(10)#2                                                   | 95.96(14)  | O(15)#3-Co(4)-O(2W)  | 86.28(17)  |
| O(12)#5-Co(2)-O(10)#2                                                 | 170.58(15) | O(6)-Co(4)-O(2W)     | 79.63(16)  |
| O(2)#4-Co(2)-N(2)#2                                                   | 84.57(17)  | N(1)-Co(4)-O(2W)     | 95.37(16)  |
| O(3W)-Co(2)-N(2)#2                                                    | 175.79(15) | O(3W)-Co(5)-O(1)#4   | 97.83(15)  |
| O(12)#5-Co(2)-N(2)#2                                                  | 85.61(16)  | O(3W)-Co(5)-O(4)#1   | 101.08(16) |
| O(10)#2-Co(2)-N(2)#2                                                  | 87.68(16)  | O(1)#4-Co(5)-O(4)#1  | 84.59(19)  |
| O(2)#4-Co(2)-O(8)#6                                                   | 171.33(15) | O(3W)-Co(5)-O(11)#5  | 86.65(15)  |
| O(3W)-Co(2)-O(8)#6                                                    | 87.53(14)  | O(1)#4-Co(5)-O(11)#5 | 96.17(17)  |
| O(12)#5-Co(2)-O(8)#6                                                  | 89.24(15)  | O(4)#1-Co(5)-O(11)#5 | 172.07(17) |
| O(10)#2-Co(2)-O(8)#6                                                  | 84.24(14)  | O(3W)-Co(5)-N(4)#4   | 169.96(16) |
| N(2)#2-Co(2)-O(8)#6                                                   | 90.74(16)  | O(1)#4-Co(5)-N(4)#4  | 88.87(17)  |
| O(1W)-Co(3)-O(13)                                                     | 92.42(16)  | O(4)#1-Co(5)-N(4)#4  | 86.92(19)  |
| O(1W)-Co(3)-O(5)                                                      | 96.55(15)  | O(11)#5-Co(5)-N(4)#4 | 85.20(18)  |
| O(13)-Co(3)-O(5)                                                      | 94.75(17)  | O(3W)-Co(5)-O(4W)    | 86.00(15)  |
| O(1W)-Co(3)-N(3)                                                      | 175.55(16) | O(1)#4-Co(5)-O(4W)   | 172.88(19) |
| O(13)-Co(3)-N(3)                                                      | 88.80(17)  | O(4)#1-Co(5)-O(4W)   | 88.80(19)  |
| O(5)-Co(3)-N(3)                                                       | 87.60(16)  | O(11)#5-Co(5)-O(4W)  | 90.02(18)  |
| O(1W)-Co(3)-O(8)#6                                                    | 87.94(14)  | N(4)#4-Co(5)-O(4W)   | 88.80(17)  |
| O(13)-Co(3)-O(8)#6                                                    | 91.55(15)  |                      |            |
| Symmetry code: #1 -x+2,-y,-z+2 #2 -x+2,-y+1,-z+2 #3 -x+1,y-1/2,-z+3/2 |            |                      |            |
| #4 x,-y+1/2,z+1/2 #5 -x+1,-y+1,-z+2 #6 x-1,y,z                        |            |                      |            |

**Table S5.** Selected Bond Lengths (Å) and Bond Angles (°) for Complex **5**

|                                                          |            |                     |            |
|----------------------------------------------------------|------------|---------------------|------------|
| Mn(1)-O(3)#5                                             | 2.291(2)   | Mn(1)-O(1)#3        | 2.160(3)   |
| Mn(1)-O(4)#5                                             | 2.283(3)   | Mn(1)-O(1W)         | 2.201(3)   |
| Mn(1)-O(2)#4                                             | 2.121(2)   | Mn(1)-N(1)          | 2.317(3)   |
| O(2)#4-Mn(1)-O(1)#3                                      | 102.39(10) |                     |            |
| O(2)#4-Mn(1)-O(1W)                                       | 83.34(11)  | O(1)#3-Mn(1)-N(1)   | 86.65(10)  |
| O(1)#3-Mn(1)-O(1W)                                       | 170.74(9)  | O(1W)-Mn(1)-N(1)    | 84.23(10)  |
| O(2)#4-Mn(1)-O(4)#5                                      | 93.02(11)  | O(4)#5-Mn(1)-N(1)   | 149.28(9)  |
| O(1)#3-Mn(1)-O(4)#5                                      | 89.24(11)  | O(3)#5-Mn(1)-N(1)   | 92.75(9)   |
| O(1W)-Mn(1)-O(4)#5                                       | 97.77(11)  | O(1W)-Mn(1)-O(3)#5  | 84.56(10)  |
| O(2)#4-Mn(1)-O(3)#5                                      | 145.81(11) | O(4)#5-Mn(1)-O(3)#5 | 57.21(9)   |
| O(1)#3-Mn(1)-O(3)#5                                      | 94.28(10)  | O(2)#4-Mn(1)-N(1)   | 117.59(10) |
| Symmetry code: #1 x,y,z+1 #2 x-1,y+1,z #3 -x+2,-y+2,-z+1 |            |                     |            |
| #4 x+1,y-1,z #5 x,y,z-1                                  |            |                     |            |

**Table S6.** Selected Bond Lengths (Å) and Bond Angles (°) for Complex 6

|                                                                                                                        |            |                     |            |
|------------------------------------------------------------------------------------------------------------------------|------------|---------------------|------------|
| Zn(1)-O(2)#1                                                                                                           | 1.965(2)   | Zn(1)-O(1)          | 2.310(3)   |
| Zn(1)-O(2)#2                                                                                                           | 1.965(2)   | Zn(1)-O(1)#4        | 2.310(3)   |
| Zn(1)-N(1)#3                                                                                                           | 2.067(4)   | N(1)#3-Zn(1)-O(1)   | 86.83(5)   |
| O(2)#1-Zn(1)-O(2)#2                                                                                                    | 109.22(16) | O(2)#1-Zn(1)-O(1)#4 | 98.97(12)  |
| O(2)#1-Zn(1)-N(1)#3                                                                                                    | 125.39(8)  | O(2)#2-Zn(1)-O(1)#4 | 84.73(12)  |
| O(2)#2-Zn(1)-N(1)#3                                                                                                    | 125.39(8)  | N(1)#3-Zn(1)-O(1)#4 | 86.83(5)   |
| O(2)#1-Zn(1)-O(1)                                                                                                      | 84.73(12)  | O(1)-Zn(1)-O(1)#4   | 173.67(10) |
| O(2)#2-Zn(1)-O(1)                                                                                                      | 98.97(12)  |                     |            |
| Symmetry code: #1 $x, -y, z - 1/2$ #2 $-x + 1, -y, -z + 2$ #3 $-x + 1/2, -y + 1/2, -z + 1$<br>#4 $-x + 1, y, -z + 3/2$ |            |                     |            |

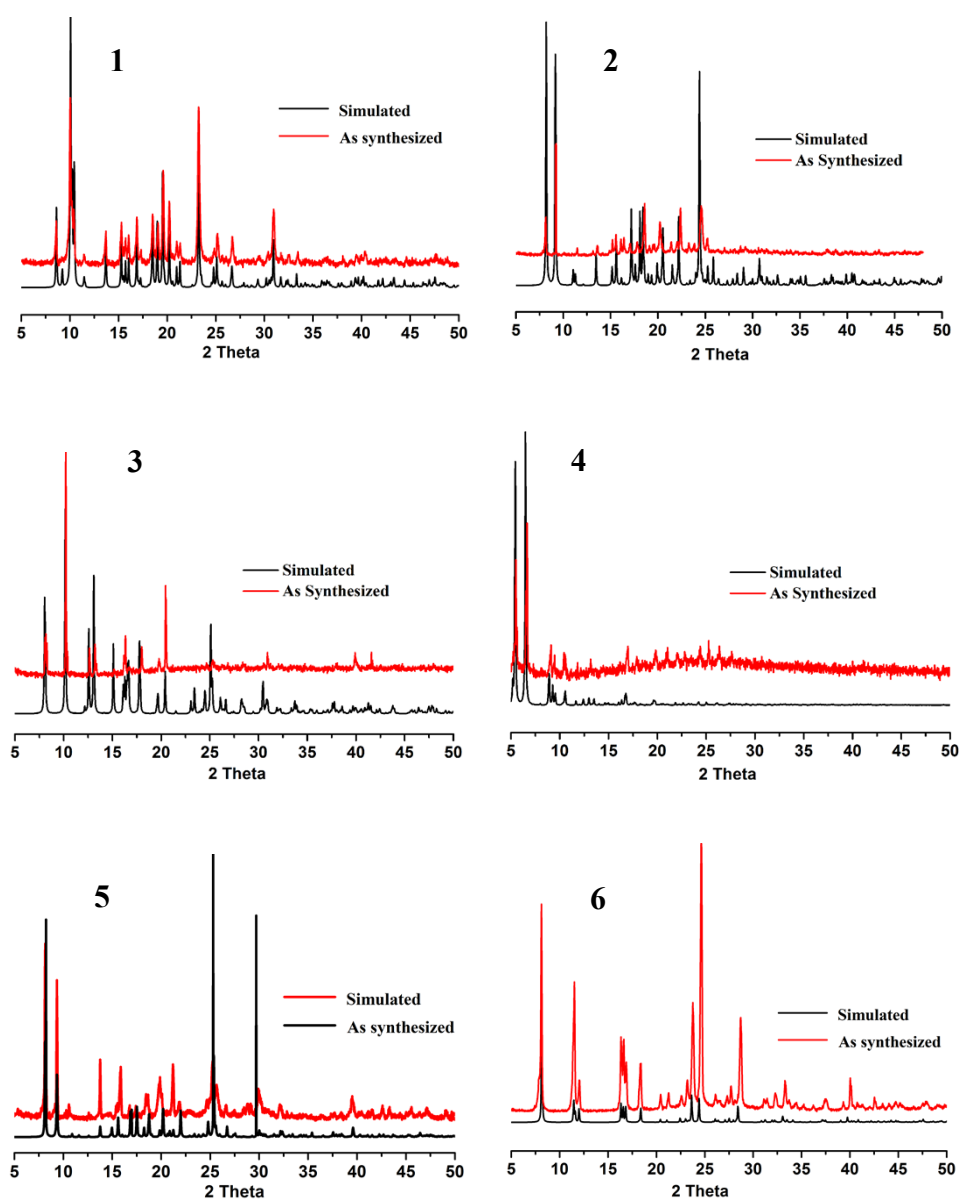**Figure S1.** PXRD simulated as-synthesized patterns for complexes 1–6.

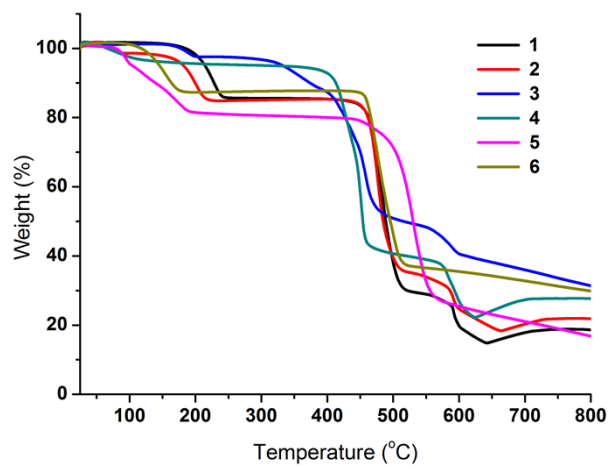

**Figure S2.** The TG curves of complexes 1–6.
